# Supplementary material for: Measurement Instrument for Scientific Teaching (MIST): A Tool to Measure the Frequencies of Research-Based Teaching Practices in Undergraduate Science Courses
Source: Atypon-hosted journal article supplement (doi:10.1187/cbe.17-02-0033), 2017-12-01
Supplement: combinedsupmats.pdf [file combinedsupmats.pdf]

# Supplemental Material

*CBE—Life Sciences Education*

Durham *et al.*

**Supplemental Material 1.** Full MIST survey. The first column indicates the order in which questions appear on MIST. Boxes in gray indicate questions included in MIST-Short. The second column indicates the ST taxonomy supporting practice to which each question applies (See Couch et al., 2015, Table 3). The third column lists the MIST question. Conditional response formatting is indicated in purple. The remaining columns indicate the answer choices for each question.

# MIST

## Measurement Instrument for Scientific Teaching

| survey order                          | refers to taxonomy item # | MIST question                                                                                                                                                                                                                                                                                                                                                                                                                                                                                                                                                        | "Please consider only the lecture portion of this course." will appear on each page of the survey. |                            |                          |                             |                                              |                                                   |                                        |
|---------------------------------------|---------------------------|----------------------------------------------------------------------------------------------------------------------------------------------------------------------------------------------------------------------------------------------------------------------------------------------------------------------------------------------------------------------------------------------------------------------------------------------------------------------------------------------------------------------------------------------------------------------|----------------------------------------------------------------------------------------------------|----------------------------|--------------------------|-----------------------------|----------------------------------------------|---------------------------------------------------|----------------------------------------|
| <b>Learning Goals &amp; Alignment</b> |                           |                                                                                                                                                                                                                                                                                                                                                                                                                                                                                                                                                                      |                                                                                                    |                            |                          |                             |                                              |                                                   |                                        |
| 1                                     | 20                        | Indicate the average percent of class time during which students were asked to answer questions, solve problems, or complete activities <u>other than listening to a lecture</u> :                                                                                                                                                                                                                                                                                                                                                                                   | slider bar 0-100%                                                                                  |                            |                          |                             |                                              |                                                   |                                        |
| 2                                     | 1                         | <p><b>Learning goals</b> are statements <i>provided by the instructor that inform students of the specific knowledge and skills that the instructor expects students to master in a course. Learning goals can be presented to students in the form of learning objectives, specific study questions, study guides, focal points, etc.</i></p> <p>[definition above to be included on all pages related to alignment (clickers, in-class, out-of-class, assessment)]</p> <p><b>Learning goals were provided for:</b></p> <p><b>Please select all that apply.</b></p> | not provided to students                                                                           | the course as a whole      | each unit or exam        | each broad topic or chapter | each specific subtopic or chapter subsection | some or most individual activities or assignments | each individual activity or assignment |
| <b>Polling questions</b>              |                           |                                                                                                                                                                                                                                                                                                                                                                                                                                                                                                                                                                      |                                                                                                    |                            |                          |                             |                                              |                                                   |                                        |
| 3                                     | 25                        | <p><b>Polling methods</b> include clickers, Poll Anywhere, Learning Catalytics, colored cards, or other audience response systems that are used to determine how many students answer a question in a particular way.</p> <p>Students were asked to use a <b>polling method</b> to answer questions in the classroom approximately:</p>                                                                                                                                                                                                                              | zero questions                                                                                     | 1-2 questions per month    | 3-4 questions per month  | 2-3 questions per week      | 4-5 questions per week                       | 6-10 questions per week                           | more than 10 questions per week        |
| 4                                     | 2                         | If a YES option to #2 and #3 ONLY: Indicate the approximate percent of <b>polling questions</b> that overlapped with the <b>learning goals</b> provided by the instructor:                                                                                                                                                                                                                                                                                                                                                                                           | slider bar 0-100%                                                                                  |                            |                          |                             |                                              |                                                   |                                        |
| 5                                     | 22,23                     | If a YES option to #3 ONLY: Indicate the approximate percent of <b>polling questions</b> for which students were asked to discuss the question in pairs or small groups:                                                                                                                                                                                                                                                                                                                                                                                             | slider bar 0-100%                                                                                  |                            |                          |                             |                                              |                                                   |                                        |
| <b>In-Class Activities</b>            |                           |                                                                                                                                                                                                                                                                                                                                                                                                                                                                                                                                                                      |                                                                                                    |                            |                          |                             |                                              |                                                   |                                        |
| 6                                     | 21                        | <p><b>In-class activities</b> other than polling questions include any exercise or activity in which the students are not listening to a lecture during class, such as student discussions, worksheets, problem sets, case studies, hands-on demonstrations, role plays, concept maps, one-minute essays, think-pair-shares, inquiry-based activities, low point value quizzes, and other related activities.</p> <p>Students were asked to complete <b>in-class activities</b> approximately:</p>                                                                   | zero times                                                                                         | up to 1 activity per month | 2-3 activities per month | 4-7 activities per month    | 2-3 activities per week                      | 4-5 activities per week                           | more than 5 activities per week        |
| 7                                     | 2                         | If a YES option to #2 and #6 ONLY: Indicate the approximate percent of <b>in-class activities</b> that overlapped with the <b>learning goals</b> provided by the instructor:                                                                                                                                                                                                                                                                                                                                                                                         | slider bar 0-100%                                                                                  |                            |                          |                             |                                              |                                                   |                                        |
| 8                                     | 21                        | If a YES option to #6 ONLY: Indicate the approximate percent of <b>in-class activities</b> for which students were given some form of general or individualized <b>feedback</b> during class <u>beyond</u> simply providing correct or incorrect answers:                                                                                                                                                                                                                                                                                                            | slider bar 0-100%                                                                                  |                            |                          |                             |                                              |                                                   |                                        |

| Out-of-Class Activities      |    |                                                                                                                                                                                                                                                                                                                                                                                                                                                                             |                   |                               |                             |                             |                             |                             |                                     |  |
|------------------------------|----|-----------------------------------------------------------------------------------------------------------------------------------------------------------------------------------------------------------------------------------------------------------------------------------------------------------------------------------------------------------------------------------------------------------------------------------------------------------------------------|-------------------|-------------------------------|-----------------------------|-----------------------------|-----------------------------|-----------------------------|-------------------------------------|--|
| 9                            | 21 | <p><b>Out-of-class assignments</b> are any required exercise, activity, or project completed outside of class time, <u>other than</u> reading a textbook or watching a video. Out-of-class assignments include worksheets, problem sets, case studies, online learning tools, inquiry-based activities, low point value quizzes, discussion boards, and other related activities.</p> <p>Students were asked to complete <b>out-of-class assignments</b> approximately:</p> | zero times        | up to 1 assignment per month  | 2-3 assignments per month   | 1 assignment per week       | 2-3 assignments per week    | 4-5 assignments per week    | more than 5 assignments per week    |  |
| 10                           | 2  | If a YES option to #2 and #9 ONLY: Indicate the approximate percent of <b>out-of-class assignments</b> that overlapped with the <b>learning goals</b> provided by the instructor:                                                                                                                                                                                                                                                                                           | slider bar 0-100% |                               |                             |                             |                             |                             |                                     |  |
| 11                           | 21 | If a YES option to #9 ONLY: Indicate the approximate percent of <b>out-of-class assignments</b> for which students were given some form of general or individualized <b>feedback beyond</b> simply providing correct or incorrect answers:                                                                                                                                                                                                                                  | slider bar 0-100% |                               |                             |                             |                             |                             |                                     |  |
| Summative Assessment         |    |                                                                                                                                                                                                                                                                                                                                                                                                                                                                             |                   |                               |                             |                             |                             |                             |                                     |  |
| 12                           | 3  | Students were asked to complete <b>major exams or term projects</b> , including final exams approximately:                                                                                                                                                                                                                                                                                                                                                                  | zero times        | 1 time during the semester    | 2 times during the semester | 3 times during the semester | 4 times during the semester | 5 times during the semester | 6 or more times during the semester |  |
| 13                           | 3  | If a YES option to #2 and #12 ONLY: Indicate the approximate percent of questions or components on <b>major exams or term projects</b> that overlapped with the <b>learning goals</b> provided by the instructor:                                                                                                                                                                                                                                                           | slider bar 0-100% |                               |                             |                             |                             |                             |                                     |  |
| 14                           | 21 | If a YES option to #12 ONLY: Indicate the approximate percent of questions or components on <b>major exams or term projects</b> for which students were given some form of general or individualized <b>feedback beyond</b> simply providing correct or incorrect answers:                                                                                                                                                                                                  | slider bar 0-100% |                               |                             |                             |                             |                             |                                     |  |
| Student-Student Interactions |    |                                                                                                                                                                                                                                                                                                                                                                                                                                                                             |                   |                               |                             |                             |                             |                             |                                     |  |
| 15                           | 22 | Students were asked to <b>work in groups</b> of two or more for any portion of this course:<br>If "no" is selected, skips to #22                                                                                                                                                                                                                                                                                                                                            | yes               | no                            |                             |                             |                             |                             |                                     |  |
| 16                           | 22 | Indicate the average percent of class time during which students were asked to <b>work in groups</b> of two or more:                                                                                                                                                                                                                                                                                                                                                        | slider bar 0-100% |                               |                             |                             |                             |                             |                                     |  |
| 17                           | 22 | <p>[In-class activities definition reappears here]</p> <p>Students were asked to <b>work in groups</b> of two or more on <b>in-class</b> activities, discussions, assignments, or projects <u>other than</u> polling questions approximately:</p>                                                                                                                                                                                                                           | zero times        | 1-2 times during the semester | about 1 time per month      | 2-3 times per month         | 1-2 times per week          | 3-4 times per week          | more than 4 times per week          |  |
| 18                           | 22 | <p>[Out-of-class activities definition reappears here]</p> <p>Students were asked or encouraged to <b>work in groups</b> of two or more on <b>out-of-class</b> activities, assignments, or projects approximately:</p>                                                                                                                                                                                                                                                      | zero times        | 1-2 times during the semester | about 1 time per month      | 2-3 times per month         | 1-2 times per week          | 3-4 times per week          | more than 4 times per week          |  |
| 19                           | 30 | <p>(Instructor version only)</p> <p>Diversity includes differences in race, ethnicity, culture, background, religion, affiliation, age, gender, orientation, course performance, personality type, etc.</p> <p>Students were grouped using a strategy that considers the diversity of each group:</p>                                                                                                                                                                       | yes               | no                            |                             |                             |                             |                             |                                     |  |
| 20                           | 24 | The instructor used a strategy, such as assigning roles, to promote the participation of each group member during in-class group activities:                                                                                                                                                                                                                                                                                                                                | not at all        | rarely                        | less than half of the time  | half of the time            | more than half of the time  | almost always               | always                              |  |
| 21                           | 26 | At least some students were asked to verbally share the results of any group work or group discussions with the whole class approximately:                                                                                                                                                                                                                                                                                                                                  | zero times        | 1-2 times during the semester | about 1 time per month      | 2-3 times per month         | 1-2 times per week          | 3-4 times per week          | more than 4 times per week          |  |
| 22                           | 23 | Students were asked to comment or make suggestions on each other's work on class assignments, activities, or projects approximately:                                                                                                                                                                                                                                                                                                                                        | zero times        | 1-2 times during the semester | about 1 time per month      | 2-3 times per month         | 1-2 times per week          | 3-4 times per week          | more than 4 times per week          |  |

| Inclusivity                               |       |                                                                                                                                                                                                                                                                                                                                  |                                                     |                                              |                                        |                             |                             |                             |                                     |
|-------------------------------------------|-------|----------------------------------------------------------------------------------------------------------------------------------------------------------------------------------------------------------------------------------------------------------------------------------------------------------------------------------|-----------------------------------------------------|----------------------------------------------|----------------------------------------|-----------------------------|-----------------------------|-----------------------------|-------------------------------------|
| 23                                        | 27    | To what extent do you agree with the following statement:<br>Students were encouraged to respond to classmates' ideas <u>during whole-class discussions</u> :                                                                                                                                                                    | this course did not include whole class discussions | strongly disagree                            | disagree                               | somewhat disagree           | somewhat agree              | agree                       | strongly agree                      |
| 24                                        | 29    | <i>Diversity includes differences in race, ethnicity, culture, background, religion, affiliation, age, gender, orientation, course performance, personality type, etc.</i><br>Examples or analogies used in this course included a diversity of people and cultures.                                                             | humans were not discussed in this course            | strongly disagree                            | disagree                               | somewhat disagree           | somewhat agree              | agree                       | strongly agree                      |
| 25                                        | 28    | <i>Diversity includes differences in race, ethnicity, culture, background, religion, affiliation, age, gender, orientation, course performance, personality type, etc.</i><br>Students were encouraged to consider the <u>ideas and contributions</u> of a diversity of <u>researchers and other people</u> involved in science. | humans were not discussed in this course            | strongly disagree                            | disagree                               | somewhat disagree           | somewhat agree              | agree                       | strongly agree                      |
| 26                                        | 31    | The instructor was sensitive to socially controversial issues.                                                                                                                                                                                                                                                                   | X                                                   | strongly disagree                            | disagree                               | somewhat disagree           | somewhat agree              | agree                       | strongly agree                      |
| Student Influence on Course Structure     |       |                                                                                                                                                                                                                                                                                                                                  |                                                     |                                              |                                        |                             |                             |                             |                                     |
| 27                                        | 5     | Students were asked to provide formal or informal feedback on course activities and content <u>prior to</u> the end of the semester evaluation.                                                                                                                                                                                  | zero times                                          | 1 time during the semester                   | 2 times during the semester            | 3 times during the semester | 4 times during the semester | 5 times during the semester | 6 or more times during the semester |
| 28                                        | 5     | <u>If a YES option to #27 ONLY</u> : Student feedback on course activities and content was used to make adjustments to the course <u>within the semester</u> :                                                                                                                                                                   | none of the time                                    | some of the time that feedback was collected | every time that feedback was collected |                             |                             |                             |                                     |
| 29                                        | 6     | Students stated interests or asked questions related to the topic at hand during class:                                                                                                                                                                                                                                          | X                                                   | strongly disagree                            | disagree                               | somewhat disagree           | somewhat agree              | agree                       | strongly agree                      |
| 30                                        | 7     | The instructor was generally aware of instances when a concept was not understood by the majority of students in the class prior to an exam:                                                                                                                                                                                     | not at all                                          | rarely                                       | less than half of the time             | half of the time            | more than half of the time  | most of the time            | always                              |
| 31                                        | 7     | When it became clear that the class did not understand a concept, students were provided with follow-up discussion, activities, or resources.                                                                                                                                                                                    | not part of this course                             | rarely                                       | less than half of the time             | half of the time            | more than half of the time  | most of the time            | always                              |
| Student Participation & Science Practices |       |                                                                                                                                                                                                                                                                                                                                  |                                                     |                                              |                                        |                             |                             |                             |                                     |
| 32                                        | 11    | Students were asked to identify or formulate hypotheses or make predictions about the results of demonstrations, experiments, or examples approximately:                                                                                                                                                                         | zero times                                          | 1-2 times during the semester                | about 1 time per month                 | 2-3 times per month         | 1-2 times per week          | 3-4 times per week          | more than 4 times per week          |
| 33                                        | 11,12 | Students were asked to critique scientific hypotheses or experimental strategies approximately:                                                                                                                                                                                                                                  | zero times                                          | 1-2 times during the semester                | about 1 time per month                 | 2-3 times per month         | 1-2 times per week          | 3-4 times per week          | more than 4 times per week          |
| 34                                        | 12    | Students were asked to design experiments to answer scientific questions approximately:                                                                                                                                                                                                                                          | zero times                                          | 1-2 times during the semester                | about 1 time per month                 | 2-3 times per month         | 1-2 times per week          | 3-4 times per week          | more than 4 times per week          |
| 35                                        | 13    | Students were asked to summarize, interpret, or analyze data using mathematical or computational procedures approximately:                                                                                                                                                                                                       | zero times                                          | 1-2 times during the semester                | about 1 time per month                 | 2-3 times per month         | 1-2 times per week          | 3-4 times per week          | more than 4 times per week          |
| 36                                        | 14    | Students were asked to make graphs or tables approximately:                                                                                                                                                                                                                                                                      | zero times                                          | 1-2 times during the semester                | about 1 time per month                 | 2-3 times per month         | 1-2 times per week          | 3-4 times per week          | more than 4 times per week          |

| Student Participation & Science Practices (continued) |        |                                                                                                                                                                                                                                                                                                                                |            |                               |                        |                     |                    |                    |                            |
|-------------------------------------------------------|--------|--------------------------------------------------------------------------------------------------------------------------------------------------------------------------------------------------------------------------------------------------------------------------------------------------------------------------------|------------|-------------------------------|------------------------|---------------------|--------------------|--------------------|----------------------------|
| 37                                                    | 14     | Students were asked to analyze or interpret scientific data shown in graphs or tables approximately:                                                                                                                                                                                                                           | zero times | 1-2 times during the semester | about 1 time per month | 2-3 times per month | 1-2 times per week | 3-4 times per week | more than 4 times per week |
| 38                                                    | 16, 17 | Students were asked to use data to make decisions or defend scientific conclusions approximately:                                                                                                                                                                                                                              | zero times | 1-2 times during the semester | about 1 time per month | 2-3 times per month | 1-2 times per week | 3-4 times per week | more than 4 times per week |
| 39                                                    | 15     | <i>Models are tools used to summarize a scientific process, including drawing pathways, diagrams, schematics, concept maps, flow charts, "road maps", tables, illustrative models, box-and-arrow diagrams, etc.</i><br>Students were asked to make <u>or</u> interpret models to summarize scientific processes approximately: | zero times | 1-2 times during the semester | about 1 time per month | 2-3 times per month | 1-2 times per week | 3-4 times per week | more than 4 times per week |
| 40                                                    | 18     | Students were asked to interpret or critique scientific literature <u>or</u> media articles related to science approximately:                                                                                                                                                                                                  | zero times | 1-2 times during the semester | about 1 time per month | 2-3 times per month | 1-2 times per week | 3-4 times per week | more than 4 times per week |
| 41                                                    | 19     | Students were asked to communicate scientific ideas in formal written papers or oral presentations approximately:                                                                                                                                                                                                              | zero times | 1-2 times during the semester | about 1 time per month | 2-3 times per month | 1-2 times per week | 3-4 times per week | more than 4 times per week |
| 42                                                    | 9      | Students were provided with examples or explanations showing that course concepts are applicable to everyday human experiences or real-life applications approximately:                                                                                                                                                        | zero times | 1-2 times during the semester | about 1 time per month | 2-3 times per month | 1-2 times per week | 3-4 times per week | more than 4 times per week |
| 43                                                    | 8      | Historical context was used to recognize why certain discoveries or advancements changed the way people viewed related scientific principles approximately:                                                                                                                                                                    | zero times | 1-2 times during the semester | about 1 time per month | 2-3 times per month | 1-2 times per week | 3-4 times per week | more than 4 times per week |
| Student Cognitive Engagement                          |        |                                                                                                                                                                                                                                                                                                                                |            |                               |                        |                     |                    |                    |                            |
| 44                                                    | 33     | Students were asked to interpret <u>or</u> represent concepts in <u>non-written</u> formats, such as pictures, diagrams, videos, simulations, role-plays, graphs, mathematical models, etc. approximately:                                                                                                                     | zero times | 1-2 times during the semester | about 1 time per month | 2-3 times per month | 1-2 times per week | 3-4 times per week | more than 4 times per week |
| 45                                                    | 35     | Students were asked to practice knowledge or skills from other <u>Science, Technology, Engineering, and Math (STEM)</u> subjects when answering questions or completing class approximately:                                                                                                                                   | zero times | 1-2 times during the semester | about 1 time per month | 2-3 times per month | 1-2 times per week | 3-4 times per week | more than 4 times per week |
| 46                                                    | 32     | Students engaged in higher level thought processes that required them to apply, analyze, incorporate, or evaluate their knowledge or skills rather than just memorizing facts or processes approximately:                                                                                                                      | zero times | 1-2 times during the semester | about 1 time per month | 2-3 times per month | 1-2 times per week | 3-4 times per week | more than 4 times per week |
| 47                                                    | 34     | Students were asked to participate in open-ended exercises, such as case-studies or questions in which multiple correct answers are possible approximately:                                                                                                                                                                    | zero times | 1-2 times during the semester | about 1 time per month | 2-3 times per month | 1-2 times per week | 3-4 times per week | more than 4 times per week |
| 48                                                    | 37     | Students were provided with opportunities or suggestions to reflect on whether their study habits were effective for learning approximately:                                                                                                                                                                                   | zero times | 1-2 times during the semester | about 1 time per month | 2-3 times per month | 1-2 times per week | 3-4 times per week | more than 4 times per week |
| 49                                                    | 36     | Students were provided with opportunities or suggestions to reflect on their problem-solving strategies approximately:                                                                                                                                                                                                         | zero times | 1-2 times during the semester | about 1 time per month | 2-3 times per month | 1-2 times per week | 3-4 times per week | more than 4 times per week |

**Supplemental Material 2.** Factor loadings and cross-loadings of the 7-factor EFA model.

| Item | Item Description                                 | EFA-derived factors |              |             |             |              |              |              |
|------|--------------------------------------------------|---------------------|--------------|-------------|-------------|--------------|--------------|--------------|
|      |                                                  | 1                   | 2            | 3           | 4           | 5            | 6            | 7            |
| Q38  | Use data to make decisions/defend conclusions    | <b>.850</b>         | .001         | -.015       | .056        | .118         | -.059        | -.035        |
| Q37  | Analyze/interpret data graphs/tables             | <b>.838</b>         | .018         | -.042       | .055        | .144         | -.045        | -.045        |
| Q35  | Summarize, interpret, analyze data with math     | <b>.710</b>         | .026         | .009        | -.039       | -.035        | -.090        | .016         |
| Q36  | Make graphs or tables                            | <b>.678</b>         | .011         | .021        | -.063       | -.073        | -.030        | .071         |
| Q33  | Critique hypotheses & experimental strategies    | <b>.645</b>         | -.118        | .050        | .048        | -.014        | .025         | -.045        |
| Q34  | Design experiments                               | <b>.621</b>         | -.150        | .053        | -.031       | -.043        | .047         | .020         |
| Q39  | Use models                                       | <b>.611</b>         | .036         | .003        | .020        | -.037        | .010         | -.092        |
| Q32  | Make hypotheses/predictions                      | <b>.537</b>         | -.134        | .044        | -.016       | -.032        | -.070        | -.165        |
| Q40  | Scientific literature or media articles          | <b>.490</b>         | -.086        | .060        | .157        | -.077        | .107         | .102         |
| Q41  | Science communication: written papers/oral pres. | <b>.413</b>         | -.048        | .042        | .013        | -.214        | .099         | .160         |
| Q45  | Interdisciplinary                                | <b>.399</b>         | .034         | .011        | .024        | -.187        | -.056        | -.104        |
| Q44  | Use non-written formats                          | <b>.319</b>         | .018         | -.019       | .006        | -.224        | -.011        | -.104        |
| Q47  | Open-ended exercises/case studies                | <b>.253</b>         | -.214        | .006        | .137        | -.183        | -.066        | -.089        |
| Q46  | Higher level thought processes                   | <b>.230</b>         | -.008        | -.005       | .037        | -.104        | -.135        | -.270        |
| Q15  | Group work: y/n <sup>1</sup>                     | -.114               | <b>-.930</b> | -.048       | -.011       | .039         | -.068        | -.056        |
| Q17  | Group work: In-class frequency                   | .021                | <b>-.890</b> | .013        | .016        | .047         | -.002        | -.033        |
| Q21  | Group work: Share results with whole class       | .006                | <b>-.806</b> | -.078       | .084        | .064         | -.106        | -.044        |
| Q20  | Group work: Group participation strategy         | .035                | <b>-.638</b> | .016        | .033        | -.110        | .055         | -.058        |
| Q18  | Group work: Out-of-class frequency               | .020                | <b>-.612</b> | -.024       | -.025       | -.167        | .025         | .008         |
| Q16  | Group work: % of class time                      | .044                | <b>-.527</b> | .187        | .004        | .079         | -.146        | .084         |
| Q6   | In-class: frequency                              | .151                | <b>-.462</b> | .274        | .004        | -.005        | .048         | -.008        |
| Q22  | Peer feedback                                    | .191                | <b>-.435</b> | -.005       | .031        | -.125        | -.035        | -.020        |
| Q23  | Students respond to each other                   | .161                | <b>-.309</b> | .035        | .168        | -.004        | -.097        | -.149        |
| Q1   | % active                                         | .110                | <b>-.289</b> | .235        | -.053       | .053         | -.248        | .046         |
| Q9   | Out-of-class: frequency                          | .156                | <b>-.183</b> | .097        | .044        | -.039        | -.109        | .174         |
| Q7   | In-class: % alignment                            | -.014               | -.127        | <b>.696</b> | -.032       | .047         | -.142        | .026         |
| Q8   | In-class: % feedback                             | -.012               | -.147        | <b>.690</b> | .001        | -.006        | -.082        | .039         |
| Q11  | Out-of-class: % feedback                         | .065                | .004         | <b>.566</b> | .017        | -.071        | .064         | .065         |
| Q10  | Out-of-class: % alignment                        | .031                | .041         | <b>.496</b> | .047        | .020         | -.126        | .030         |
| Q14  | Exams: % feedback                                | .007                | .022         | <b>.465</b> | .008        | -.054        | .089         | -.130        |
| Q13  | Exams: % alignment                               | -.090               | .128         | <b>.416</b> | .035        | .032         | -.044        | -.211        |
| Q2   | Learning goal max frequency                      | .040                | -.067        | <b>.230</b> | .023        | -.104        | .007         | -.112        |
| Q25  | Diverse scientist/researcher contributions       | -.022               | .004         | -.044       | <b>.941</b> | .009         | -.009        | .062         |
| Q24  | Diverse examples & analogies                     | -.046               | -.026        | .007        | <b>.810</b> | -.043        | .025         | .038         |
| Q26  | Instructor sensitivity                           | .025                | .034         | .057        | <b>.245</b> | .033         | -.010        | -.237        |
| Q48  | Reflection: effective study habits               | -.048               | .019         | .022        | .067        | <b>-.875</b> | -.027        | -.003        |
| Q49  | Reflection: problem-solving strategies           | .019                | -.010        | .045        | .034        | <b>-.834</b> | -.054        | -.037        |
| Q27  | Students provide feedback on activities/content  | .092                | -.103        | .034        | .020        | <b>-.352</b> | -.118        | -.054        |
| Q28  | Make adjustment from student feedback            | .087                | -.141        | .055        | .041        | <b>-.276</b> | -.080        | -.169        |
| Q4   | Polling method: % alignment                      | -.006               | .126         | .147        | .005        | -.045        | <b>-.882</b> | -.019        |
| Q5   | Polling method: % peer learning                  | -.006               | -.048        | .067        | .025        | .008         | <b>-.736</b> | .038         |
| Q3   | Polling method: frequency                        | .034                | -.133        | -.147       | -.029       | -.098        | <b>-.679</b> | -.019        |
| Q30  | Instructor aware of student non-understanding    | -.023               | -.072        | .073        | -.011       | -.101        | .013         | <b>-.768</b> |
| Q31  | Follow-up activities provided if not understood  | .010                | -.058        | .076        | .002        | -.119        | -.010        | <b>-.700</b> |
| Q29  | Student state interests & ask original questions | .065                | -.083        | .035        | .063        | .057         | -.023        | <b>-.510</b> |
| Q42  | Course concepts applicable to life               | .181                | .058         | .027        | .118        | -.147        | .039         | <b>-.298</b> |

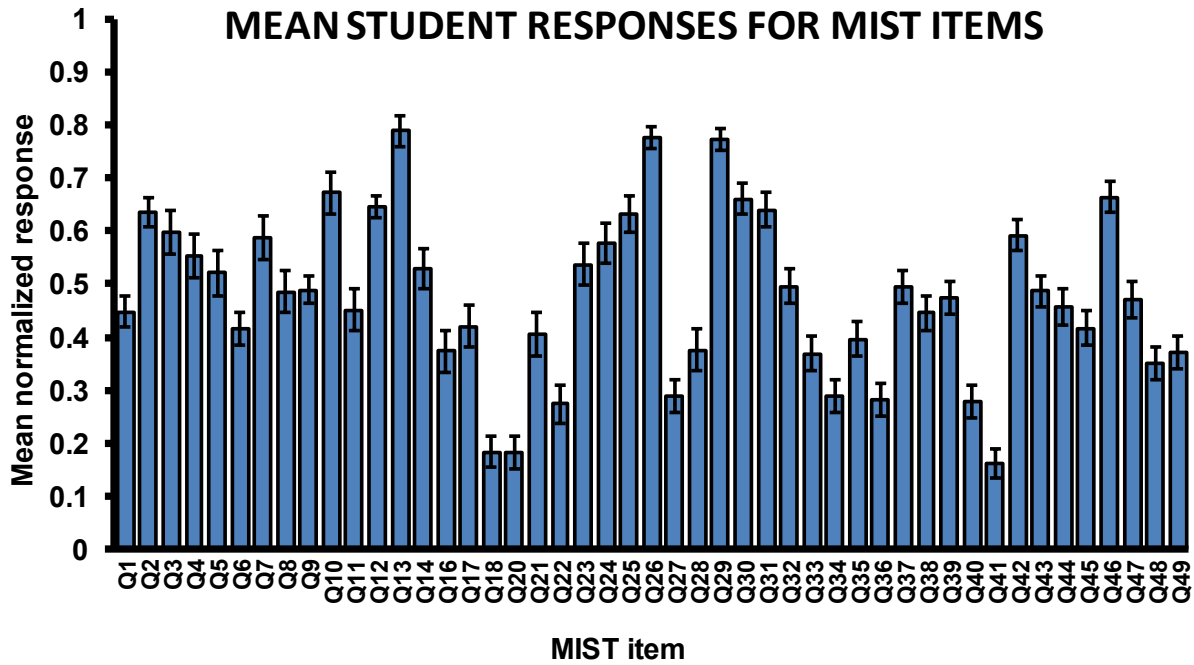

**Supplemental Material 3.** Mean normalized scores for individual MIST items. Bars represent the mean of all individual normalized student responses for each MIST item  $\pm$  SE.  $n = 7767$  students.

Supplemental Material 6. Summary of MIST questions in handout form.

# MIST

## Measurement Instrument for Scientific Teaching

| Q #                                   | MSC <sup>1</sup> | MIST question                                                                                                                                                                                                                                        | Instructor Response:          |
|---------------------------------------|------------------|------------------------------------------------------------------------------------------------------------------------------------------------------------------------------------------------------------------------------------------------------|-------------------------------|
| <b>Learning Goals &amp; Alignment</b> |                  |                                                                                                                                                                                                                                                      |                               |
| 1                                     | ALS              | Indicate the average percent of class time during which students were asked to answer questions, solve problems, or complete activities <u>other than listening to a lecture</u> :                                                                   | 0-100%                        |
| 2                                     | LGF              | Learning goals <sup>2</sup> were provided for:                                                                                                                                                                                                       | select all:<br>7-pt frequency |
| <b>Clickers</b>                       |                  |                                                                                                                                                                                                                                                      |                               |
| 3                                     | ALS              | Students were asked to use a <b>polling method</b> <sup>2</sup> to answer questions in the classroom approximately:                                                                                                                                  | 7-pt frequency                |
| 4                                     | LGF              | Indicate the approximate percent of <b>polling questions</b> that overlapped with the <b>learning goals</b> provided by the instructor:                                                                                                              | 0-100%                        |
| 5                                     | ALS              | Indicate the approximate percent of <b>polling questions</b> for which students were asked to discuss the question in pairs or small groups:                                                                                                         | 0-100%                        |
| <b>In-Class Activities</b>            |                  |                                                                                                                                                                                                                                                      |                               |
| 6                                     | ALS              | Students were asked to complete <b>in-class activities</b> <sup>2</sup> approximately:                                                                                                                                                               | 7-pt frequency                |
| 7                                     | LGF              | Indicate the approximate percent of <b>in-class activities</b> that overlapped with the <b>learning goals</b> provided by the instructor:                                                                                                            | 0-100%                        |
| 8                                     | LGV              | Indicate the approximate percent of <b>in-class activities</b> for which students were given some form of general or individualized <b>feedback</b> during class <u>beyond</u> simply providing correct or incorrect answers:                        | 0-100%                        |
| <b>Out-of-Class Activities</b>        |                  |                                                                                                                                                                                                                                                      |                               |
| 9                                     | ALS              | Students were asked to complete <b>out-of-class assignments</b> <sup>2</sup> approximately:                                                                                                                                                          | 7-pt frequency                |
| 10                                    | LGV              | Indicate the approximate percent of <b>out-of-class assignments</b> that overlapped with the <b>learning goals</b> provided by the instructor:                                                                                                       | 0-100%                        |
| 11                                    | LGV              | Indicate the approximate percent of <b>out-of-class assignments</b> for which students were given some form of general or individualized <b>feedback</b> <u>beyond</u> simply providing correct or incorrect answers:                                | 0-100%                        |
| <b>Summative Assessment</b>           |                  |                                                                                                                                                                                                                                                      |                               |
| 12                                    | none             | Students were asked to complete <b>major exams or term projects</b> , including final exams approximately:                                                                                                                                           | 7-pt frequency                |
| 13                                    | LGV              | Indicate the approximate percent of questions or components on <b>major exams or term projects</b> that overlapped with the <b>learning goals</b> provided by the instructor:                                                                        | 0-100%                        |
| 14                                    | LGV              | Indicate the approximate percent of questions or components on <b>major exams or term projects</b> for which students were given some form of general or individualized <b>feedback</b> <u>beyond</u> simply providing correct or incorrect answers: | 0-100%                        |
| <b>Student-Student Interactions</b>   |                  |                                                                                                                                                                                                                                                      |                               |
| 15                                    | none             | Students were asked to <b>work in groups</b> of two or more for any portion of this course:                                                                                                                                                          | no/yes                        |
| 16                                    | ALS              | Indicate the average percent of class time during which students were asked to <b>work in groups</b> of two or more:                                                                                                                                 | 0-100%                        |
| 17                                    | ALS              | Students were asked to <b>work in groups</b> of two or more on <b>in-class</b> activities, discussions, assignments, or projects <u>other than</u> <u>polling questions</u> approximately:                                                           | 7-pt frequency                |
| 18                                    | ALS              | Students were asked or encouraged to <b>work in groups</b> of two or more on <b>out-of-class</b> activities, assignments, or projects approximately:                                                                                                 | 7-pt frequency                |
| 19                                    | none             | (Instructor version only)<br>Students were grouped using a strategy that considers the diversity <sup>2</sup> of each group:                                                                                                                         | no/yes                        |
| 20                                    | ALS              | The instructor used a strategy, such as assigning roles, to promote the participation of each group member during in-class group activities:                                                                                                         | 7-pt frequency                |
| 21                                    | ALS              | At least <u>some</u> students were asked to verbally share the results of any group work or group discussions with the whole class approximately:                                                                                                    | 7-pt frequency                |
| 22                                    | ALS              | Students were asked to comment or make suggestions on each other's work on class assignments, activities, or projects approximately:                                                                                                                 | 7-pt frequency                |



| Inclusivity                               |      |                                                                                                                                                                                                                                 |                           |
|-------------------------------------------|------|---------------------------------------------------------------------------------------------------------------------------------------------------------------------------------------------------------------------------------|---------------------------|
| 23                                        | ALS  | Students were encouraged to respond to classmates' ideas <u>during whole-class discussions</u> :                                                                                                                                | 6-pt disagree/agree + n/a |
| 24                                        | Inc  | Examples or analogies used in this course included a diversity <sup>2</sup> of people and cultures.                                                                                                                             | 6-pt disagree/agree + n/a |
| 25                                        | Inc  | Students were encouraged to consider the <u>ideas and contributions</u> of a diversity <sup>2</sup> of <u>researchers and other people</u> involved in science.                                                                 | 6-pt disagree/agree + n/a |
| 26                                        | Inc  | The instructor was sensitive to socially controversial issues.                                                                                                                                                                  | 6-pt disagree/agree       |
| Student Influence on Course Structure     |      |                                                                                                                                                                                                                                 |                           |
| 27                                        | CSR  | Students were asked to provide formal or informal feedback on course activities and content <u>prior to</u> the end of the semester evaluation.                                                                                 | 7-pt frequency            |
| 28                                        | CSR  | Student feedback on course activities and content was used to make adjustments to the course <u>within the semester</u> :                                                                                                       | 3-pt frequency            |
| 29                                        | RTS  | Students stated interests or asked questions related to the topic at hand during class:                                                                                                                                         | 6-pt disagree/agree       |
| 30                                        | RTS  | The instructor was generally aware of instances when a concept was not understood by the majority of students in the class prior to an exam:                                                                                    | 6-pt disagree/agree + n/a |
| 31                                        | RTS  | When it became clear that the class did not understand a concept, students were provided with follow-up discussion, activities, or resources.                                                                                   | 6-pt disagree/agree + n/a |
| Student Participation & Science Practices |      |                                                                                                                                                                                                                                 |                           |
| 32                                        | EDC  | Students were asked to identify or formulate hypotheses or make predictions about the results of demonstrations, experiments, or examples approximately:                                                                        | 7-pt frequency            |
| 33                                        | EDC  | Students were asked to critique scientific hypotheses or experimental strategies approximately:                                                                                                                                 | 7-pt frequency            |
| 34                                        | EDC  | Students were asked to design experiments to answer scientific questions approximately:                                                                                                                                         | 7-pt frequency            |
| 35                                        | DAI  | Students were asked to summarize, interpret, or analyze data using mathematical or computational procedures approximately:                                                                                                      | 7-pt frequency            |
| 36                                        | DAI  | Students were asked to make graphs or tables approximately:                                                                                                                                                                     | 7-pt frequency            |
| 37                                        | DAI  | Students were asked to analyze or interpret scientific data shown in graphs or tables approximately:                                                                                                                            | 7-pt frequency            |
| 38                                        | DAI  | Students were asked to use data to make decisions or defend scientific conclusions approximately:                                                                                                                               | 7-pt frequency            |
| 39                                        | DAI  | Students were asked to make <u>or</u> interpret models <sup>2</sup> to summarize scientific processes approximately:                                                                                                            | 7-pt frequency            |
| 40                                        | EDC  | Students were asked to interpret or critique scientific literature <u>or</u> media articles related to science approximately:                                                                                                   | 7-pt frequency            |
| 41                                        | EDC  | Students were asked to communicate scientific ideas in formal written papers or oral presentations approximately:                                                                                                               | 7-pt frequency            |
| 42                                        | RTS  | Students were provided with examples or explanations showing that course concepts are applicable to everyday human experiences or real-life applications approximately:                                                         | 7-pt frequency            |
| 43                                        | none | Historical context was used to recognize why certain discoveries or advancements changed the way people viewed related scientific principles approximately:                                                                     | 7-pt frequency            |
| Student Cognitive Engagement              |      |                                                                                                                                                                                                                                 |                           |
| 44                                        | CS   | Students were asked to interpret <u>or</u> represent concepts in <u>non-written</u> formats, such as pictures, diagrams, videos, simulations, role-plays, graphs, mathematical models, etc. approximately:                      | 7-pt frequency            |
| 45                                        | CS   | Students were asked to practice knowledge or skills from other <u>Science</u> , <u>Technology</u> , <u>Engineering</u> , and <u>Math</u> (STEM) subjects when answering questions or completing class activities approximately: | 7-pt frequency            |
| 46                                        | CS   | Students engaged in higher level thought processes that required them to apply, analyze, incorporate, or evaluate their knowledge or skills rather than just memorizing facts or processes approximately:                       | 7-pt frequency            |
| 47                                        | CS   | Students were asked to participate in open-ended exercises, such as case-studies or questions in which multiple correct answers are possible approximately:                                                                     | 7-pt frequency            |
| 48                                        | CSR  | Students were provided with opportunities or suggestions to reflect on whether their study habits were effective for learning approximately:                                                                                    | 7-pt frequency            |
| 49                                        | CSR  | Students were provided with opportunities or suggestions to reflect on their problem-solving strategies approximately:                                                                                                          | 7-pt frequency            |

<sup>1</sup>MIST subcategory abbreviations: ALS: Active Learning Strategies, LGF: Learning Goal Use and Feedback, Inc: Inclusivity,RTS: Responsiveness to Students, EDC: Experimental Design and Communication, DAI: Data Analysis and Interpretation, CS: Cognitive Skills, CSR: Course and Self Reflection

<sup>2</sup>These terms are defined in the survey, and definitions can be found in Supplemental Material 1.
